# Supplementary material for: The effectiveness of a social media intervention for reducing portion sizes in young adults and adolescents
Source: PubMed Central journal article supplement (PMC6757490; doi:10.1177/2055207619878076), 2019-09-22
Supplement: DHJ878076_Supplemental_Material.pdf [file DHJ878076_Supplemental_Material.pdf]

## 1 **Supplementary material**

2

### 3 *HED snack and SSB information*

4 The HED foods and SSBs were selected because they are foods and drinks which are  
5 frequently overconsumed by this age range. The HED snacks consisted of sweet and savoury  
6 snacks and the SSBs consisted of soda, squash, energy drinks, and milkshake. For the snack  
7 foods, photographs were taken of four portions to represent half a portion, one portion, one  
8 and a half portions, and twice the recommended portion, which were weighed (in grams) and  
9 then plated for photography. Snacks were presented on a white 27cm (diameter) plate with a  
10 knife and fork on either side to provide size perspective. For the SSBs, photographs were  
11 taken of three portions to represent a small, medium and a large portion. The drink  
12 photographs were taken of the bottle/can next to a pint glass which contained the amount  
13 from the bottle/ can. The portion sizes of the drinks differed according to the type of drink.  
14 While the manufacturers recommended portions for SSBs are 250ml, this portion size is not  
15 commonly found in supermarkets. Thus, the SSB portion sizes reflect the typical portion  
16 sizes which are available for purchase. For example, a small can of a sugar-sweetened  
17 carbonated beverage was 150ml, a medium can was 330ml and a large was 500ml, in  
18 comparison to a small serving of full sugar squash, which was 250ml, a medium serving was  
19 288ml, and a large serving was 500ml.

20

### 21 *Calculating desired portion size*

22 To identify participants' 'desired' portion size, participants were presented with photographs  
23 on the online survey of 24 HED and LED foods, and seven SSBs and non-SSBs. For the

24 HED snacks participants were presented with four portion sizes (half a portion, one portion,  
25 one and a half portions and two portions) and for the SSBs participants were presented with  
26 three portion sizes (small, medium and large). The HED foods were presented first, followed  
27 by the LED foods, and then the drinks. The order which the food and drinks were presented  
28 in was randomised using randomizer.org to ensure that the portion sizes of the foods were  
29 evenly distributed, and the same food did not appear twice in a row with a different portion  
30 size. Desired portion size was calculated by identifying which portion size participants  
31 selected as being 'just right' for each food and drink item. For example, if half a portion was  
32 selected as being 'just right' then the desired portion size for that participant was 0.5, whereas  
33 if one portion was selected as being 'just right' then the desired portion size was 1, and so on.  
34 If participants rated more than one portion size as 'just right' an average of the portions  
35 resulted in the 'just right' portion. If all the portions were selected as 'too little' or 'slightly  
36 less than I would eat' then the largest portion size (2) was selected, and if all of the portions  
37 were selected as 'too much' or 'slightly more than I would eat' then the smallest portion size  
38 (0.5) was selected. Following this, a mean desired portion size was calculated for the HED  
39 snacks combined and the SSBs combined as two separate variables at the two time points  
40 (baseline and intervention end).

41

#### 42 *Frequency, liking and intentions*

43 Participants were presented with the statements: 'I intend to reduce my portion sizes of high  
44 calorie snack food in the near future', 'I intend to reduce my portion sizes of sugar-sweetened  
45 beverages in the near future', 'I intend to keep my portions of high calorie snack food the  
46 same in the near future', 'I intend to keep my portions of sugar-sweetened beverages the  
47 same in the near future'. Participants rated these statements on a 5-point Likert scale from

48 completely disagree to completely agree. For frequency participants were asked ‘during the  
49 past month, how often did you eat this food’ with six response options from ‘less than once  
50 per month or never’ (coded as 1) to ‘every day or more than once per day’ (coded as 6). For  
51 liking, participants were asked ‘how much do you like this item?’ with five response options  
52 (Likert scale) from ‘strongly dislike’ (coded as 1) to ‘strongly like’ (coded as 5).

53

54

## 55 **Unadjusted results**

56 The results have been adjusted for age and BMI (intervention 1)/ zBMI (intervention 2). All  
57 means and SDs for all supplementary analyses are reported in supplementary table 1 for  
58 intervention 1, and supplementary table 2 for intervention 2.

59

## 60 **Intervention 1 results adjusted for age and BMI**

### 61 *Participants' reported portion sizes*

62 The results of the ANOVA showed no significant main effect of food type [ $F(1, 16) = .15, p = .70, \eta^2 = .01$ ], no significant main effect of time [ $F(1, 16) = 4.10, p = .06, \eta^2 = .20$ ], and  
63 no significant food type\*time interaction [ $F(1, 16) = .17, p = .69, \eta^2 = .01$ ] on participants'  
64 desired portion sizes of HED snacks and SSBs between baseline and intervention end. Thus,  
65 the results indicate that exposure to the intervention did not influence participants rated  
66 desired portions of HED snacks and SSBs. See supplementary Table 1 for desired portion  
67 sizes at baseline and intervention end.

69

### 70 *Reported perceptions of their peers' portion sizes*

71 There was no significant main effect of food type [ $F(1, 16) = .95, p = .34, \eta^2 = .06$ ]. There  
72 was a significant main effect of time [ $F(1, 16) = 4.95, p = .04, \eta^2 = .24$ ], whereby,  
73 participants perceptions of their peers' portions of HED snacks and SSBs reduced following  
74 the intervention compared to baseline. There was no significant food type\*time interaction [ $F(1, 16) = < .001, p = .99, \eta^2 = < .001$ ] on participants' perceptions of their peers' portion  
75 sizes between baseline and intervention end. The intervention influenced participants'  
76 perceptions of their peers' portion sizes of HED snacks, whereby, participants perceived their  
77

78 peers to consume smaller portions of HED snacks following the intervention compared to  
79 baseline.

80

### 81 *Reported frequency of consumption and liking*

82 For frequency of consumption, there was no significant main effect of food type [F (1, 16) =  
83 .13,  $p = .73$ ,  $\eta^2 = .01$ ], no significant main effect of time [F (1, 16) = 1.10,  $p = .31$ ,  $\eta^2 =$   
84 .06], and no significant food type\*time interaction [F (1, 16) = 1.42,  $p = .25$ ,  $\eta^2 = .08$ ] on  
85 participants' frequency of consumption of HED snacks or SSBs between baseline and  
86 intervention end. For liking, there was no significant main effect of food type [F (1, 16) = .98,  
87  $p = .34$ ,  $\eta^2 = .06$ ], no significant main effect of time [F (1, 16) = .17,  $p = .69$ ,  $\eta^2 = .01$ ], and  
88 no significant food type\* time interaction [F (1, 16) = .60,  $p = .45$ ,  $\eta^2 = .04$ ]. The  
89 intervention did not influence participants' reported frequency of consumption or liking of  
90 either HED snacks or SSBs. The intervention did not influence participants' frequency of  
91 consumption or liking of HED snacks or SSBs.

92

### 93 *Intentions*

94 There was no significant main effect of food type [F (1, 16) = 1.44,  $p = .25$ ,  $\eta^2 = .08$ ], no  
95 significant main effect of time [F (1, 16) = .80,  $p = .38$ ,  $\eta^2 = .05$ ], and no significant  
96 time\*food type interaction [F (1, 16) = .15,  $p = .71$ ,  $\eta^2 = .01$ ] on participants' intentions  
97 regarding their portion sizes of HED snacks or SSBs. Thus, the intervention did not influence  
98 participants' intentions regarding their portion sizes.

99 **Table S1.** Participants' mean (SDs) desired portion sizes, perceptions of peers' desired  
 100 portion sizes, frequency of consumption, liking, and intentions regarding participants' HED  
 101 snack and SSB intake, adjusted for age and BMI.

|                                             | HED snacks (n=19) |                  | SSBs (n=19) |                  |
|---------------------------------------------|-------------------|------------------|-------------|------------------|
|                                             | Baseline          | Intervention end | Baseline    | Intervention end |
| Participants' desired portion size*         | 1.45 (.29)        | 1.29 (.27)       | .87 (.21)   | .79 (.26)        |
| Perceptions of peers' desired portion size* | 1.48 (.26)        | 1.37 (.26)       | .86 (.23)   | .90 (.25)        |
| Frequency of consumption**                  | 1.58 (.34)        | 1.52 (.46)       | 2.18 (.76)  | 2.00 (.82)       |
| Liking**                                    | 4.00 (.39)        | 3.96 (.31)       | 3.77 (.65)  | 3.82 (.44)       |
| Intentions ***                              | 3.13 (.28)        | 3.08 (.34)       | 3.16 (.34)  | 3.13 (.50)       |

102 \*For desired portion size, a value of 1 refers to the recommended portion size for HED snacks and the typical  
 103 portion for SSBs. A number greater than 1 indicates the 'desired' portion size is greater than the recommended/  
 104 typical portion, and a number smaller than 1 indicates that the 'desired' portion size is smaller than the  
 105 recommended/typical portion.

106 \*\* Frequency of consumption was measured on a 6-point Likert style scale from once per month or never to  
 107 daily. Liking was measured on a 5-point Likert scale from strongly dislike to strongly like.

108 \*\*\*Intentions were assessed on a 5-point Likert-style scale from completely disagree to completely agree.

109

110

111 **Intervention 2 results adjusted for age and zBMI**

112 *Participants' reported portion sizes*

113 There was no significant main effect of condition [ $F(1, 30) = 2.62, p = .12, \eta^2 = .08$ ], no  
 114 significant main effect of food type [ $F(1, 30) = 2.31, p = .14, \eta^2 = .07$ ], and no significant  
 115 main effect of time [ $F(1, 30) = 1.46, p = .24, \eta^2 = .05$ ]. There were no significant  
 116 interactions between condition and food type [ $F(1, 30) = .18, p = .68, \eta^2 = .01$ ], condition  
 117 and time [ $F(1, 30) = .004, p = .95, \eta^2 < .001$ ], and no significant condition\*food type\*time  
 118 interaction [ $F(1, 30) = .62, p = .44, \eta^2 = .02$ ] on participants' desired portion sizes of HED  
 119 snacks and SSBs between baseline and intervention end. Thus, the intervention did not

120 influence participants to reduce their desired portion sizes of HED snacks or SSBs relative to  
121 the control condition.

122

123 *Reported perceptions of peers' portion sizes*

124 There was no significant main effect of condition [ $F(1, 30) = .56, p = .46, \eta^2 = .02$ ], no  
125 significant main effect of food type [ $F(1, 30) = 2.59, p = .12, \eta^2 = .08$ ], and no significant  
126 main effect of time [ $F(1, 30) = .23, p = .63, \eta^2 = .01$ ]. There were no significant interactions  
127 between condition and food type [ $F(1, 30) = 1.23, p = .28, \eta^2 = .04$ ], condition and time [ $F$   
128  $(1, 30) = .19, p = .67, \eta^2 = .01$ ], food type and time [ $F(1, 30) = .79, p = .38, \eta^2 = .03$ ], and  
129 no significant condition\*food type\*time interaction [ $F(1, 30) = 1.34, p = .26, \eta^2 = .04$ ] on  
130 participants' perceptions of their peers' portion sizes of HED snacks and SSBs between  
131 baseline and intervention end. Thus, the intervention did not significantly influence  
132 participants' perceptions of their peers' desired portion sizes of HED snacks or SSBs relative  
133 to the control condition.

134

135 *Reported frequency of consumption and liking*

136 There was no significant main effect of condition [ $F(1, 30) = .40, p = .53, \eta^2 = .01$ ], no  
137 significant main effect of food type [ $F(1, 30) = .02, p = .89, \eta^2 = .001$ ], and no significant  
138 main effect of time [ $F(1, 30) = 1.16, p = .29, \eta^2 = .04$ ]. There were no significant  
139 interactions between condition and food type [ $F(1, 30) = .07, p = .79, \eta^2 = .001$ ], condition  
140 and time [ $F(1, 30) = .58, p = .45, \eta^2 = .02$ ], food type and time [ $F(1, 30) = .48, p = .50, \eta^2$   
141  $= .02$ ], and no significant condition\*food type\*time interaction [ $F(1, 30) = .16, p = .69, \eta^2$   
142  $= .01$ ] on participants' frequency of consumption of HED snacks and SSBs between baseline

143 and intervention end. For liking, there was no significant main effect of condition [F (1, 30) =  
144 .25,  $p = .62$ ,  $\eta^2 = .01$ ], no significant main effect of food type [F (1, 30) = .50,  $p = .49$ ,  $\eta^2$   
145 =.02], and no significant main effect of time [F (1, 30) = 1.20,  $p = .28$ ,  $\eta^2 = .04$ ]. There were  
146 no significant interactions between condition and food type [F (1, 30) < .001,  $p = .99$ ,  $\eta^2 <$   
147 .001], condition and time [F (1, 30) = .58,  $p = .45$ ,  $\eta^2 = .02$ ], food type and time [F (1, 30) =  
148 .14,  $p = .71$ ,  $\eta^2 = .01$ ], and no significant food type\*time\*condition interaction [F (1, 30) =  
149 .01,  $p = .93$ ,  $\eta^2 = < .001$ ]. Thus, the intervention did not influence participants' reported  
150 frequency of consumption or liking.

151

### 152 *Intentions*

153 There was no significant main effect of condition [F (1, 29) = .04,  $p = .84$ ,  $\eta^2 = .002$ ], no  
154 significant main effect of food type [F (1, 29) = 1.00,  $p = .33$ ,  $\eta^2 = .03$ ], and no significant  
155 main effect of time [F (1, 29) = 1.47,  $p = .24$ ,  $\eta^2 = .05$ ]. There were no interactions between  
156 condition and food type [F (1, 29) = 3.14,  $p = .09$ ,  $\eta^2 = .10$ ], condition and time [F (1, 29) =  
157 .05,  $p = .83$ ,  $\eta^2 = .002$ ], food type and time [F (1, 29) = .46,  $p = .50$ ,  $\eta^2 = .02$ ], and no  
158 significant condition\*time\*food type interaction [F (1, 29) = .32,  $p = .58$ ,  $\eta^2 = .01$ ]. Thus,  
159 the intervention did not influence adolescents' intentions regarding their portion sizes.

160

## 161 **Results of Intervention 1 with the male participant removed**

### 162 *Participants' reported desired portion sizes*

163 There was a significant main effect of time [F (1, 18) = 12.57,  $p = .002$ ,  $\eta^2 = .41$ ].

164 Participants reported smaller desired portion sizes of HED snacks and SSBs at intervention



165 end than at baseline. There was no significant food type by time interaction [ $F(1, 18) = 2.67$ ,  
166  $p = .12$ ,  $\eta p^2 = .13$ ].

167 **Table S2.** Mean (SDs) participants' reports of desired portion sizes, perceptions of peers' desired portion sizes, frequency of consumption,  
 168 liking, and intentions regarding participants' HED snack and SSB intake adjusted for age and zBMI.

|                                             | HED snacks   |                  |            |                  | SSBs         |                  |            |                  |
|---------------------------------------------|--------------|------------------|------------|------------------|--------------|------------------|------------|------------------|
|                                             | Intervention |                  | Control    |                  | Intervention |                  | Control    |                  |
|                                             | Baseline     | Intervention end | Baseline   | Intervention end | Baseline     | Intervention end | Baseline   | Intervention end |
| Participants' desired portion size*         | 1.22 (.35)   | 1.22 (.37)       | 1.38 (.33) | 1.40 (.36)       | .82 (.22)    | .80 (.24)        | .95 (.33)  | .89 (.33)        |
| Perceptions of peers' desired portion size* | 1.36 (.39)   | 1.35 (.38)       | 1.44 (.35) | 1.52 (.29)       | .91 (.28)    | .93 (.26)        | .93 (.27)  | .91 (.30)        |
| Participants' frequency of consumption**    | 2.07 (.53)   | 2.07 (.61)       | 2.05 (.56) | 1.91 (.45)       | 2.28 (.88)   | 2.24 (.73)       | 2.15 (.92) | 2.06 (.94)       |
| Liking**                                    | 4.14 (.49)   | 4.06 (.56)       | 4.13 (.56) | 3.89 (.91)       | 3.91 (.81)   | 3.65 (.97)       | 3.90 (.92) | 3.46 (1.16)      |
| Intentions                                  | 3.11 (.37)   | 3.08 (.60)       | 3.13 (.58) | 3.23 (.32)       | 3.14 (.45)   | 3.28 (.60)       | 3.03 (.23) | 3.10 (.43)       |

169 \*For desired portion size, a value of 1 refers to the recommended portion size of HED snacks and the typical portion size of SSBs. A number greater than 1 indicates the  
 170 'desired' portion size is greater than the recommended/ typical portion, and a number smaller than 1 indicates that the 'desired' portion size is smaller than the  
 171 recommended/typical portion.

172 \*\* Frequency of consumption was measured on a 6-point Likert style scale from once per month or never to daily. Liking was measured on a 5-point Likert scale from  
 173 strongly dislike to strongly like.

174 \*\*\*Intentions were assessed on a 5-point Likert-style scale from completely disagree to completely agree.

175

176
